# Supplementary material for: 2-Guanidino-quinazoline promotes the readthrough of nonsense mutations underlying human genetic diseases
Source: PubMed Central journal article supplement — Proc Natl Acad Sci U S A. 2022 Aug 22;119(35):e2122004119. doi: 10.1073/pnas.2122004119 (PMC9436315; doi:10.1073/pnas.2122004119), 2022-08-22
Supplement: pnas.2122004119.sapp.pdf [file pnas.2122004119.sapp.pdf]

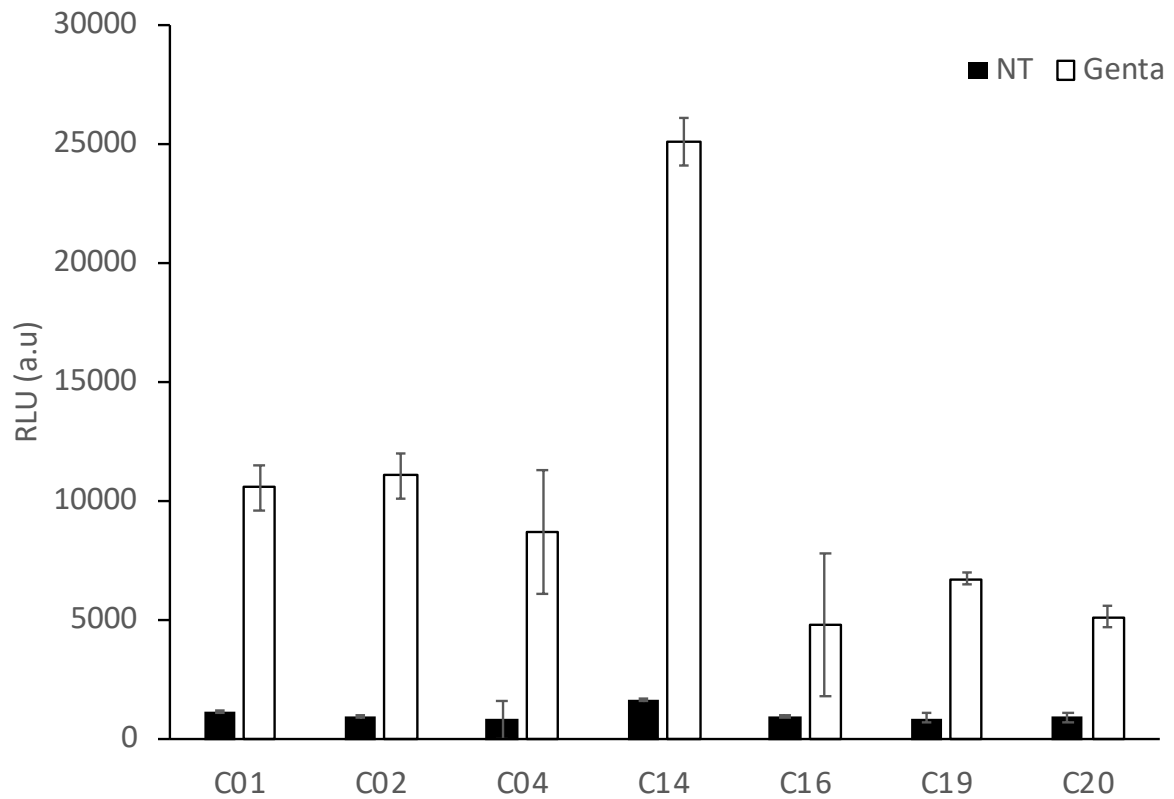

Figure S1. Selection of the recombinant cell line for HTS

Recombinant NIH3T3 cells were cultured in 96-well plates, at an initial density of 15,000 cells/well. Luciferase activity was quantified by adding coelenterazine directly to the wells ( $n=4$ ). Black and white bars represent basal *Metridia* luciferase activity and gentamicin (1.6 mM)-induced activity, respectively. We retained clone number C14 for further development.

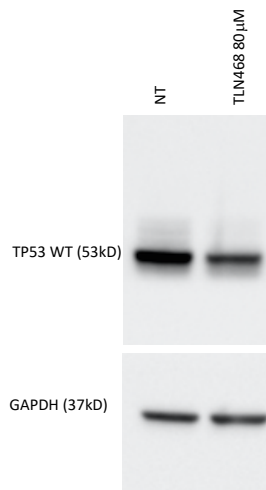

Figure S2. **WT TP53 is not stabilized by TLN468.** Total proteins were extracted from H1299 cells, expressing the WT TP53, treated or not (NT) with TLN468. GAPDH is used as a loading control.

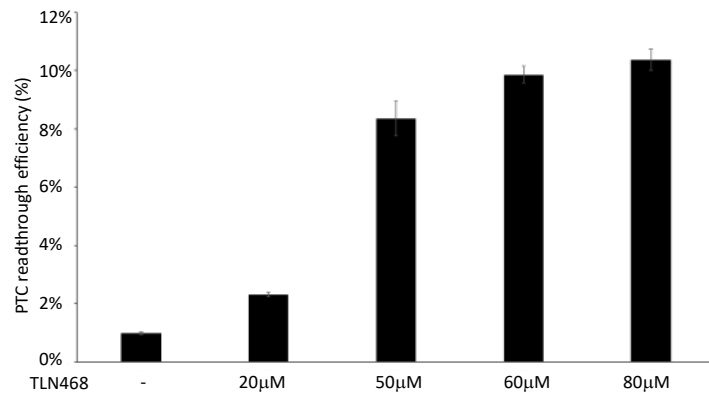

**Figure S3. TLN468 dose-response.** HeLa cells were transfected with pAC99-R213X reporter system and treated with increasing concentration of TLN468 (from 0 to 80μM) during 24H. Bars represent the median value of the ratio between R213X and the in-frame control. At least four independent experiments for each treatment have been performed.

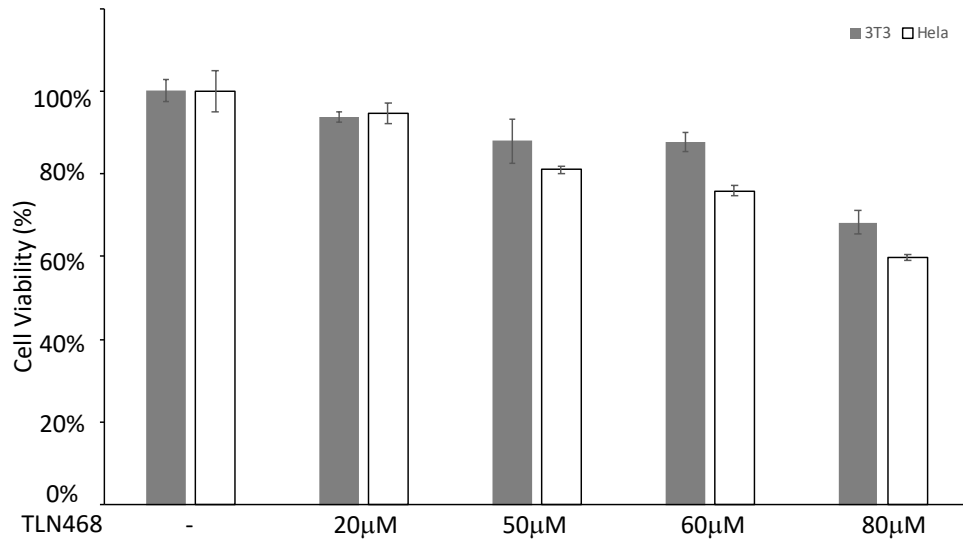

**Figure S4. TLN468 toxicity assay.** HeLa and NIH3T3 cells were treated or not with different doses of TLN468 during 24 hours. Viability was quantified after addition of a tetrazolium salt which is cleaved to formazan only in viable metabolically active cells.

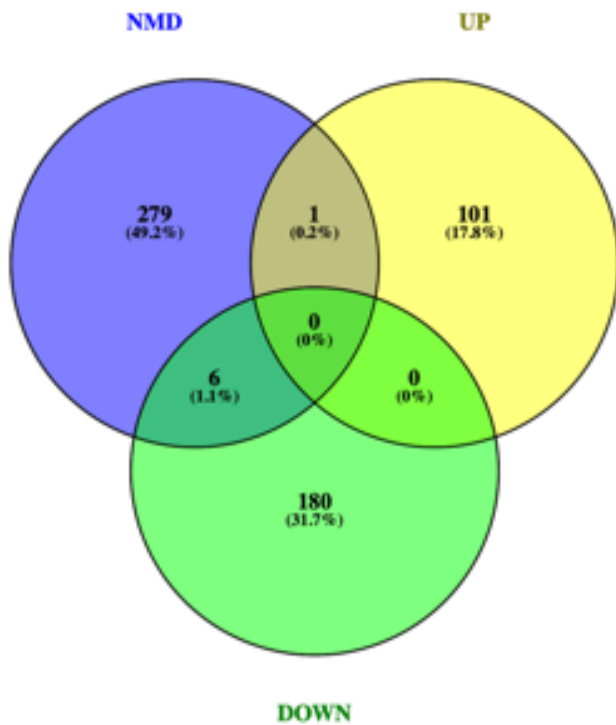

**Figure S5. TLN468 does not impact the level of NMD-sensitive transcripts.** Venn Diagram comparing the 286 human genes described by Lou C.H *et al.* Stem Cell rep; 6, 6; 844-857 (2016) to be sensitive to NMD and stabilized by deletion of UPF1 (Blue, NMD), with genes for which we observed an increase (UP) or a decrease (DOWN) of RNA levels by RNAseq in presence of TLN468 ( $\text{Log}_2\text{FC} \leq -1$  or  $\text{Log}_2\text{FC} \geq 1$  with a  $\text{padj} < 10^{-3}$ ).

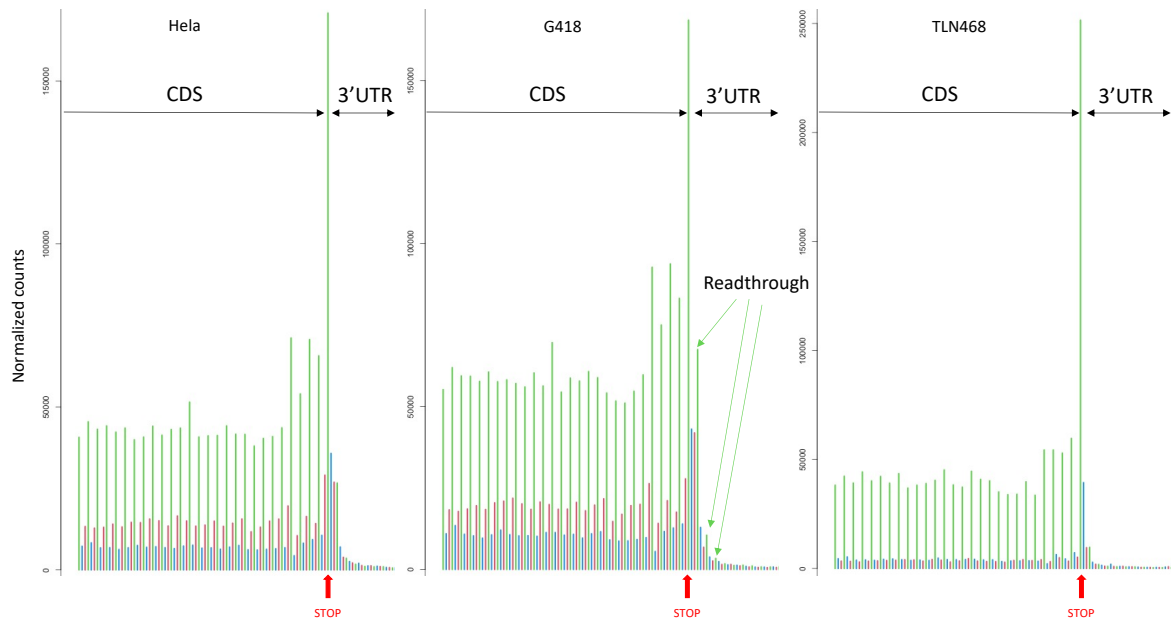

**Figure S6. Metagene of RiboSeq.** Metagene representation of RiboSeq periodicity for 29-mers RPF of the three samples (Hela, G418 and TLN468). Each bar represents the average value for the A-site position of each RPF for three independent experiments normalized to the size of the library. The red arrow indicates the position of the first nucleotide of the stop codon. Frames 0, +1 and +2 are indicated in green, blue and red respectively. Y-Axis scale has been adapted to fit the accumulation of ribosomes at the TC.

| Name   | Nonsense mutation |     |     |     |     |     |     | Frequency (%) | % RT DMSO | SD    | % RT Genta | SD    | %RT TLN468 | SD    |
|--------|-------------------|-----|-----|-----|-----|-----|-----|---------------|-----------|-------|------------|-------|------------|-------|
| R145X  | AGC               | TGG | GTC | TGA | CAA | TCA | ACT | 0.75          | 1.73%     | 0.10% | 3.10%      | 0.25% | 3.24%      | 0.54% |
| S147X  | GTC               | CGA | CAA | TGA | ACT | CGT | AAT | 0.14          | 0.17%     | 0.05% | 0.38%      | 0.04% | 0.55%      | 0.07% |
| Q194X  | TCA               | GCC | ACA | TAA | CGA | CTG | GAA | 2.63          | 0.04%     | 0.00% | 0.05%      | 0.01% | 0.12%      | 0.01% |
| R195X  | GCC               | ACA | CAA | TGA | CTG | GAA | CAT | 0.61          | 1.76%     | 0.32% | 2.50%      | 0.37% | 1.16%      | 0.21% |
| Q267X  | GAA               | CAT | TTT | TAG | TTA | CAT | CAT | 2.63          | 0.03%     | 0.00% | 0.02%      | 0.01% | 0.16%      | 0.16% |
| R539X  | TTG               | GGA | GAT | TGA | TGG | GCA | AAC | 0.34          | 0.07%     | 0.01% | 0.64%      | 0.08% | 0.22%      | 0.05% |
| Q555X  | GTT               | CTT | TTA | TAA | GAC | ATC | CTT | 0.07          | 0.02%     | 0.00% | 0.06%      | 0.01% | 0.06%      | 0.02% |
| L654X  | TGG               | GAT | ATT | TAA | CAT | CAA | AAA | 0.07          | 0.02%     | 0.00% | 0.04%      | 0.00% | 0.03%      | 0.01% |
| E761X  | GAC               | TTA | AAA | TAA | AAA | GTC | AAT | 0.55          | 0.02%     | 0.00% | 0.02%      | 0.00% | 0.11%      | 0.01% |
| R768X  | GCC               | ATA | GAG | TGA | GAA | AAA | GCT | 0.82          | 0.06%     | 0.01% | 0.08%      | 0.01% | 0.52%      | 0.13% |
| R1051X | AAT               | AAA | CTC | TGA | AAA | ATT | CAG | 0.55          | 0.10%     | 0.01% | 0.13%      | 0.01% | 1.68%      | 0.14% |
| W1075  | AAG               | GAG | GAA | TAG | CCT | GCC | CTT | 2.63          | 0.05%     | 0.01% | 0.09%      | 0.03% | 0.19%      | 0.02% |
| E1182X | GAG               | TAT | CTT | TAG | AGA | GAT | TTT | 0.07          | 0.02%     | 0.00% | 0.03%      | 0.00% | 0.35%      | 0.03% |
| W1268X | TGG               | GCA | TGT | TGA | CAT | GAG | TTA | 0.07          | 0.20%     | 0.02% | 0.71%      | 0.09% | 2.85%      | 0.63% |
| R1577X | CGT               | AAG | ATG | TGA | AAG | GAA | ATG | 0.68          | 0.28%     | 0.02% | 0.32%      | 0.06% | 0.95%      | 0.20% |
| R1666X | GTC               | ACC | TCC | TGA | GCA | GAA | GAG | 0.75          | 0.06%     | 0.00% | 0.11%      | 0.01% | 0.45%      | 0.05% |
| R1844X | GAG               | AGA | AAG | TGA | GAG | GAA | ATA | 0.27          | 0.04%     | 0.01% | 0.12%      | 0.02% | 0.25%      | 0.05% |
| R1868X | AGG               | TCT | CAA | TGA | AGA | AAA | AAG | 0.61          | 0.02%     | 0.00% | 0.03%      | 0.01% | 0.17%      | 0.03% |
| W1879X | TCT               | CAT | CAG | TGA | TAT | CAG | TAC | 0.07          | 0.08%     | 0.01% | 0.13%      | 0.03% | 1.17%      | 0.13% |
| Y1882X | TGG               | TAT | CAG | TAA | AAG | AGG | CAG | 0.14          | 0.01%     | 0.00% | 0.02%      | 0.00% | 0.03%      | 0.00% |
| W1956X | AGC               | AAG | CGC | TAG | CGG | GAA | ATT | 0.07          | 0.02%     | 0.00% | 0.07%      | 0.00% | 0.09%      | 0.01% |
| R1967X | GCT               | CAG | TTT | TGA | AGA | CTC | AAC | 0.61          | 0.06%     | 0.00% | 0.35%      | 0.05% | 0.63%      | 0.05% |
| E2035X | TTT               | AAG | CAA | TAG | GAG | TCT | CTG | 5.26          | 0.10%     | 0.01% | 0.12%      | 0.02% | 0.18%      | 0.04% |
| R2095X | TAC               | AAG | GAC | TGA | CAA | GGG | CGA | 0.55          | 0.33%     | 0.04% | 0.60%      | 0.04% | 1.05%      | 0.08% |
| E2286X | ATA               | AGC | CCA | TAA | GAG | CAA | GAT | 2.63          | 0.01%     | 0.00% | 0.01%      | 0.00% | 0.12%      | 0.01% |
| Q2526X | AGG               | CGT | CCC | TAG | TTG | GAA | GAA | 0.07          | 0.04%     | 0.00% | 0.11%      | 0.01% | 0.40%      | 0.04% |
| R2553X | ATT               | ACG | GAT | TGA | ATT | GAA | AGA | 0.82          | 0.18%     | 0.01% | 0.35%      | 0.02% | 0.84%      | 0.05% |
| Q2574X | CGG               | AGG | CAA | TAG | TTG | AAT | GAA | 2.63          | 0.03%     | 0.00% | 0.05%      | 0.00% | 0.13%      | 0.03% |
| K2791X | GAA               | CTT | CGG | TAA | AAG | TCT | CTC | 2.63          | 0.02%     | 0.00% | 0.02%      | 0.00% | 0.12%      | 0.01% |
| R2870X | GAG               | ACT | GTA | TGA | ATA | TTT | CTG | 0.82          | 0.06%     | 0.00% | 0.08%      | 0.01% | 0.69%      | 0.11% |
| R2905X | CGG               | CTT | CTA | TGA | AAG | CAG | GCT | 0.34          | 0.11%     | 0.02% | 0.16%      | 0.02% | 3.38%      | 0.54% |
| W2925X | TCC               | GCT | GAC | TGA | CAG | AGA | AAA | 0.14          | 0.15%     | 0.03% | 0.95%      | 0.21% | 0.70%      | 0.14% |
| R2982X | AAG               | GCA | CTT | TGA | GAA | GAA | AAT | 0.55          | 0.05%     | 0.00% | 0.15%      | 0.03% | 0.71%      | 0.07% |
| R3034X | GTC               | GAG | GAC | TGA | GTC | GTC | CAG | 0.55          | 0.06%     | 0.01% | 0.09%      | 0.01% | 0.51%      | 0.12% |
| S3127X | TTG               | AGC | CTG | TGA | GCT | GCA | TGT | 2.63          | 0.02%     | 0.00% | 0.03%      | 0.00% | 0.17%      | 0.02% |

|        |     |     |     |     |     |     |     |      |       |       |       |       |       |       |
|--------|-----|-----|-----|-----|-----|-----|-----|------|-------|-------|-------|-------|-------|-------|
| R3190X | GAT | ACG | GGA | TGA | ACA | GGG | AGG | 0.89 | 0.19% | 0.01% | 0.24% | 0.03% | 1.92% | 0.39% |
| R3345X | TTT | TCT | GGT | TGA | GTT | GCA | AAA | 0.48 | 0.04% | 0.00% | 0.01% | 0.00% | 0.10% | 0.01% |
| R3370X | GAA | GAT | GTT | TGA | GAC | TTT | GCC | 1.02 | 0.04% | 0.00% | 0.10% | 0.02% | 0.46% | 0.10% |
| R3381X | AAC | AAA | TTT | TGA | ACC | AAA | AGG | 1.57 | 0.05% | 0.01% | 0.19% | 0.03% | 0.29% | 0.08% |
| R3391X | AAG | CAT | CCC | TGA | ATG | GGC | TAC | 1.5  | 0.13% | 0.01% | 0.25% | 0.03% | 0.27% | 0.01% |

---

Table S1. List of the 40 more frequent PTC found in DMD
